subsystems, instead of limiting depth to describing an observed state as somehow more profound in an ill-defined manner. Of course, this is based on an enormous simplification of the nervous system. But even at that, it allows the concept of depth to provide a much more meaningful context for the complexities described by Garcia and Sleight. It also encourages us to view anesthesia not as a unitary phenomenon, but rather as a suite of altered neurologic functions roughly affiliated with a suite of neurologic regions. And it is this suite of regions, and their interconnections, that provides a substrate of sufficient complexity to encompass all the alterations caused by anesthetics.

### Competing Interests

The author declares no competing interests.

**Robert M. Knapp, D.O., J.D.,** Tufts University School of Medicine, Tufts Medical Center, Boston, Massachusetts. rknapp@tuftsmedicalcenter.org

### References

1. Garcia P, Sleight J: Ketamine: A drug at war with itself. *ANESTHESIOLOGY* 2017; 126:371–2
2. Eger EI II: Age, minimum alveolar anesthetic concentration, and minimum alveolar anesthetic concentration-awake. *Anesth Analg* 2001; 93:947–53
3. Daniel M, Weiskopf RB, Noorani M, Eger EI II: Fentanyl augments the blockade of the sympathetic response to incision (MAC-BAR) produced by desflurane and isoflurane: Desflurane and isoflurane MAC-BAR without and with fentanyl. *ANESTHESIOLOGY* 1998; 88:43–9
4. Wang L, Spary E, Deuchars J, Deuchars SA: Tonic GABAergic inhibition of sympathetic preganglionic neurons: A novel substrate for sympathetic control. *J Neurosci* 2008; 28:12445–52
5. Ebert TJ: Sympathetic and hemodynamic effects of moderate and deep sedation with propofol in humans. *ANESTHESIOLOGY* 2005; 103:20–4

(Accepted for publication July 26, 2017)

## Amendments and Corrections to Mattusch *et al.* (*ANESTHESIOLOGY* 2015; 122[5]:1047–59), “Impact of Hyperpolarization-activated, Cyclic Nucleotide-gated Cation Channel Type 2 for the Xenon-mediated Anesthetic Effect: Evidence from *In Vitro* and *In Vivo* Experiments”

To the Editor:

We previously reported that the anesthetic xenon impairs hyperpolarization-activated, cyclic nucleotide-gated cation channel type 2 (HCN2) function and thalamocortical signal propagation in murine thalamocortical slices, and supported by *in vivo* data, we discussed these findings as hypothetical

mechanisms that might contribute to the anesthetic property of xenon.<sup>1</sup> Subsequent to this publication, concerns were expressed to the Editor-in-Chief of the journal regarding part of the methodology, as well as the validity of the interpretation of our observations. In that correspondence, the following putative limitations of the *in vitro* and *in vivo* data were expressed:

- Under our experimental conditions, a change in oxygen concentration and/or pH could have occurred during xenon application that confounded interpretation of or even directly elicited the observed effects.
- The concentration of xenon in the *in vivo* experiments was uncertain.
- The observed *in vivo* effects were due to deficits in locomotor activity of the mice secondary to deletion of the HCN2 channel itself.

Within the course of the ensuing communications, discrepancies between the methods employed and their description in the original article were also identified. For this we are indeed grateful, and these mistakes have also been corrected below. These issues prompted the Editor-in-Chief to request that we clarify the methodologic approach used in our original publication and suggested performing additional experiments to confirm that the effects observed were indeed exclusively due to xenon. We thank the Editor-in-Chief for the opportunity to address those concerns here.

### *In Vitro* Results

In the following sections, all data are reported as means  $\pm$  SD. One of the criticisms focused on the oxygenation of the brain slices and, referring to Mattusch *et al.*,<sup>1</sup> it was claimed that our slices were subjected to very low oxygen levels. In the Materials and Methods section of Mattusch *et al.*,<sup>1</sup> we wrongly indicated that the storage chamber was perfused with artificial cerebrospinal fluid (aCSF) at a rate of 5 ml/min and the recording chamber at a flow rate of 2 to 3 ml/min. Even though many acknowledged experts in the field do in fact perfuse their slices with exactly those rates or only 1.5 to 3 ml/min,<sup>2–8</sup> and some do not even provide any information,<sup>9–15</sup> in our experiments the recording chamber was in fact perfused at a rate of 5 to 8 ml/min. The storage chamber (beaker with a gauze platform for the slices to be kept on) was not connected to a perfusion system but rather aerated directly with carbogen gas (95% O<sub>2</sub>/5% CO<sub>2</sub>). Insufficient oxygen tension is unlikely to be a confounding variable for the following reasons:

As standardized by almost all research groups performing *in vitro* slice experiments, we aerated the aCSF with carbogen. When aCSF was recirculated at a flow rate of 5 to 8 ml/min, an oxygen-sensitive biosensor (ISO-OXY-2 oxygen sensor; World Precision Instruments, USA) located at the bottom of the recording chamber revealed an oxygen partial pressure of  $501 \pm 27$  Torr ( $n = 4$ ). The discrepancy between the calculated oxygen pressure (approximately 690 Torr in the laboratory) and our measured pressure level is not

surprising and can well be explained by the constraints of perfusion (e.g., open surfaces in the reservoir and chamber). As such, the commonly used statement “aCSF was saturated with carbogen gas” could, in the strictest formalistic sense, be interpreted by some to be misleading. However, this term is more or less standardized in many publications in the field, and fellow colleagues know precisely what is meant.

Even if according to Ivanov and Zilberter<sup>16</sup> the high rate of perfusion used (5 to 8 ml/min) is still too slow, there is ample evidence that intracellular signaling cascades and synaptic transmission remain unperturbed under these conditions. This is demonstrated by numerous studies<sup>17–23</sup> (including several from our laboratories) that report reliable induction of long-term potentiation over many hours under comparable flow rates, which would not be possible under hypoxic conditions. Thus, the slices perfused with the flow rate used in Mattusch *et al.*<sup>1</sup> were not hypoxic, certainly not to a degree that would have any relevance for interpretation of the results.

For evaluating the neuronal effects of xenon in brain slices in Mattusch *et al.*,<sup>1</sup> xenon was applied within prefabricated gas mixtures consisting of:

- 18% xenon/47% N<sub>2</sub>/30% O<sub>2</sub>/5% CO<sub>2</sub>
- 30% xenon/35% N<sub>2</sub>/30% O<sub>2</sub>/5% CO<sub>2</sub>
- 65% xenon/30% O<sub>2</sub>/5% CO<sub>2</sub>
- 100% xenon

The composition of these gas mixtures was documented imprecisely in the Materials and Methods section of Mattusch *et al.*<sup>1</sup> These xenon gas mixtures were applied together with carbogen. Co-application of our gas mixture containing 65% xenon together with carbogen at the same flow rate would consequently lead to a calculated gas concentration of 32.5% xenon/62.5% O<sub>2</sub>/5% CO<sub>2</sub>. Given the nature of electrophysiologic measurements in acute brain slices, the experiments were performed using open perfusion systems. This might lead to a discrepancy between the calculated and the true gas fractions and the resulting partial pressures of dissolved gases in the aCSF. Gas chromatography revealed a concentration of 1.9 mM xenon dissolved in aCSF. We consequently avoided stating that the slices themselves were exposed to 65% xenon in Mattusch *et al.*<sup>1</sup> but reported the effect of 1.9 mM xenon throughout the manuscript. We now see that this lack of clarity in the description of our experimental setting was obviously a cause for serious concern, and for this we apologize.

It was also argued that our experimental procedure led to a simultaneous change of both the oxygen and xenon partial pressure. The change in oxygen partial pressure might interfere with the validity of the results since it could be impossible to distinguish whether the observed effects were either due to xenon or subsequent to the changed oxygen tension (or the combination of both).

To address this issue, we now measured the partial pressure of oxygen and carbon dioxide and monitored pH in the presence of carbogen alone or when co-applied with either a

nitrogen gas mixture (65% N<sub>2</sub>/30% O<sub>2</sub>/5% CO<sub>2</sub>) or a xenon gas mixture (xenon 65%/O<sub>2</sub> 30%/CO<sub>2</sub> 5%). When nitrogen mixture was co-applied with carbogen, the partial pressure of oxygen was significantly reduced from 501 ± 27 to 421 ± 17 Torr ( $P = 0.011$ ;  $n = 4$ ) near the bottom of the recording chamber (i.e., at the level where the brain slice would be located). Comparably, oxygen partial pressure was reduced from 531 ± 14 to 466 ± 15 Torr ( $P < 0.001$ ;  $n = 5$ ) when the aCSF was aerated with xenon mixture. The pH of the aCSF remained unchanged with either carbogen only (7.43 ± 0.02) or carbogen and nitrogen mixture aeration (7.47 ± 0.01;  $n = 4$ ;  $P > 0.05$ ). Similarly, xenon mixture co-application did not affect pH (7.47 ± 0.01 carbogen only *vs.* 7.47 ± 0.02 carbogen + xenon mixture;  $n = 5$ ;  $P > 0.05$ ). In summary, we could detect a decrease in oxygen partial pressure of ~80 Torr with nitrogen mixture and ~64 Torr with xenon mixture.

To rule out any potential implications of differences in oxygen tension for the interpretation of our results, we now provide additional results from supplementary voltage-sensitive dye imaging and patch clamp experiments.

### Voltage-sensitive Dye Imaging Experiments

First, we tested whether co-application of nitrogen mixture in carbogen-aerated aCSF had any effect on the cortical fast depolarization-mediated signal (FDS) in response to electrical stimulation of the ventrobasal nucleus. aCSF was aerated with carbogen, and under these conditions stable baseline recordings for at least 20 min were performed, following which the nitrogen mixture was co-applied. As shown in figure 1 (A and B), the fractional change in fluorescence ( $\Delta F/F$ ) within the region of interest did not change (carbogen: 1.00 ± 0.08, carbogen + nitrogen mixture: 0.96 ± 0.15;  $n = 10$ ;  $P = 0.75$ ). These results clearly demonstrate that the additional application of a gas mixture with an oxygen fraction of 30% (the balance of the admixture being 65% N<sub>2</sub> and 5% CO<sub>2</sub>) to aCSF saturated with 95% oxygen does not affect neuronal activity as measured by FDS.

We then re-evaluated the inhibitory effect of xenon on FDS propagation in the thalamocortical slice preparation. Slices were superfused with aCSF aerated with carbogen and nitrogen mixture. After stable baseline recordings of FDS for at least 20 min, we replaced the nitrogen mixture with xenon mixture (applied at the same flow rate and still in the presence of carbogen; fig. 1C). Under these conditions, xenon produced a significant reversible reduction in the FDS to 0.74 ± 0.04 normalized to control ( $n = 7$ ;  $P < 0.01$ ; fig. 1D). Taken together, these results indicate that it is xenon *per se* and not a reduction in oxygen tension that produces a decrease in FDS propagation.

### Whole Cell Patch Clamp Recordings

Since we observed a slight but significant reduction of the partial pressure of dissolved oxygen in the aCSF during co-application of carbogen with xenon 65% (or nitrogen 65%) gas admixture, we performed subsequent experiments to test whether this decrease in oxygen might compromise

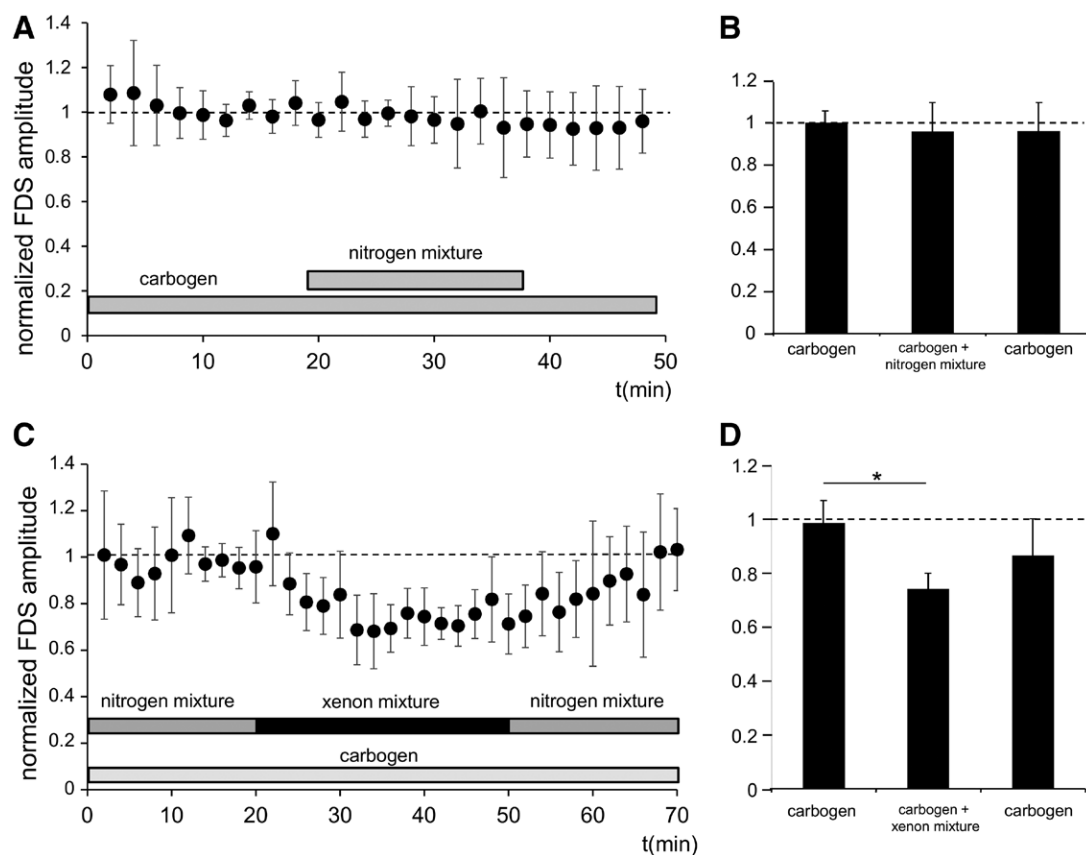

**Fig. 1.** Co-application of nitrogen gas mixture has no effect on thalamocortical signal propagation, whereas substituting nitrogen gas mixture with xenon gas mixture results in diminished signal propagation. Voltage-sensitive dye imaging was used to assess thalamocortical signal propagation following thalamic stimulation. (A) Averaged data plotted versus time. Each symbol represents the fast depolarization signal (FDS) activity averaged more than 2 min. At the beginning of each experiment, artificial cerebrospinal fluid (aCSF) was aerated with carbogen gas; after obtaining 20 min of stable baseline responses, nitrogen mixture was co-applied to the aCSF for 20 min (as shown). (B) Bar diagram showing the mean FDS amplitude recorded during the last 5 min of carbogen, carbogen + nitrogen mixture, and carbogen (washout) aeration. (C) Thalamocortical brain slices were perfused with aCSF aerated with carbogen and nitrogen mixture as indicated by the bars at the bottom. After stable baseline recordings of FDS activity, nitrogen mixture was replaced by xenon mixture, which reversibly suppressed the FDS. (D) Bar diagram showing the mean FDS amplitude recorded during the last 5 min of carbogen + nitrogen mixture, carbogen + xenon mixture, and carbogen + nitrogen mixture aeration. Averaged data indicate that xenon reversibly decreased FDS amplitudes induced by thalamic stimulation to  $0.74 \pm 0.04$  normalized to control ( $n = 7$ ).  $*P < 0.01$ .

the validity of the effects of xenon on  $I_h$  currents recorded from thalamocortical neurons as originally described.<sup>1</sup> In these newly performed experiments, the carbogen-saturated aCSF was additionally aerated with the nitrogen mixture. Co-aeration of aCSF with carbogen and nitrogen mixture had no effect on  $I_h$  amplitude ( $96.9 \pm 21\%$  of control when cells were hyperpolarized to  $-133$  mV,  $n = 5$ ;  $P > 0.05$ ; fig. 2A), voltage sag ( $1.18 \pm 0.31$  relative to control;  $n = 5$ ;  $P > 0.05$ ; fig. 2B), or rebound delay ( $0.92 \pm 0.20$  relative to control;  $n = 5$ ;  $P > 0.05$ ; fig. 2B) in thalamocortical neurons. Replacing nitrogen with xenon did, however, reduce  $I_h$  at hyperpolarized membrane voltages (fig. 2C). In these experiments, the aCSF was co-aerated with carbogen and nitrogen mixture as the control condition, and nitrogen mixture was then replaced by xenon mixture for the experimental condition. We found that xenon significantly reduced  $I_h$  amplitude at the most hyperpolarized membrane potential tested

(reduction by  $0.23 \pm 0.18$  compared to  $I_h$  amplitude under carbogen + nitrogen mixture;  $n = 5$ ;  $P < 0.05$ ; fig. 2C). This degree of reduction was not significantly different from the effect of xenon described previously ( $0.33 \pm 0.12$ ).<sup>1</sup>

In summary, these subsequent experiments clearly demonstrate that the reduction of oxygen partial pressure by  $\sim 64$  Torr does not affect neuronal signaling or HCN channel-mediated currents. These observations are supported by further findings that argue against a relevant change in oxygen supply during xenon application:

- Unchanged resting membrane potential under xenon conditions (see fig. 2D in Mattusch *et al.*<sup>1</sup>)
- Unchanged AP threshold and AP frequency under xenon conditions (see fig. 2, E and F, in Mattusch *et al.*<sup>1</sup>).

Interestingly, a critique was also raised that xenon affects  $I_h$  currents obviously only when cells were hyperpolarized.

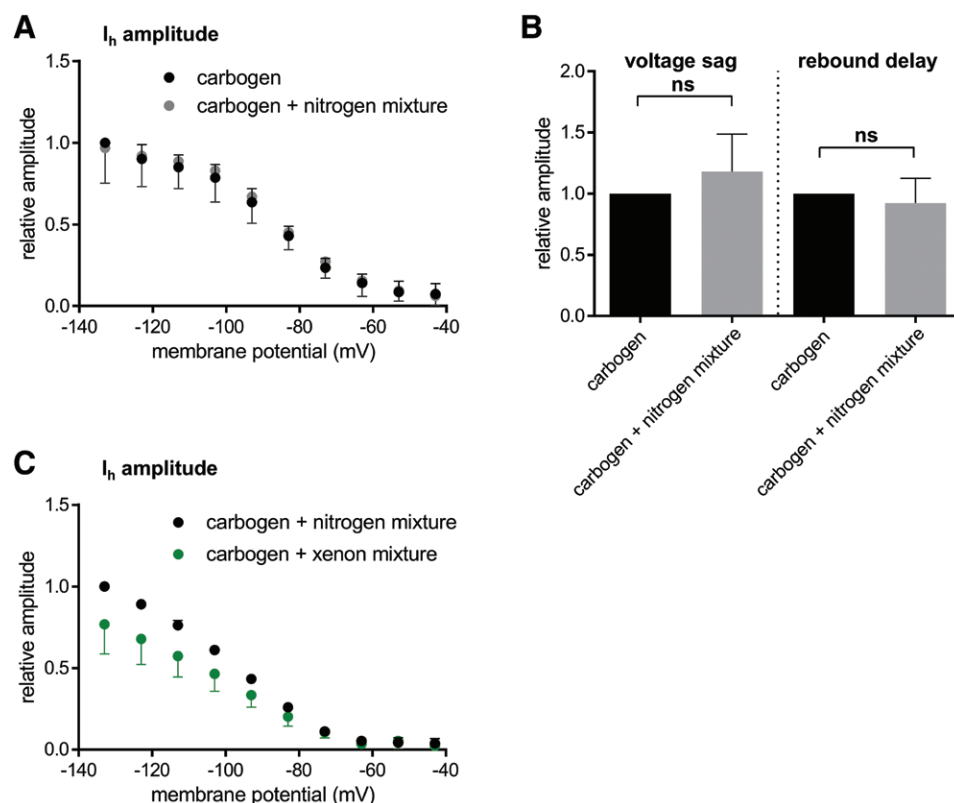

**Fig. 2.** Co-application of nitrogen gas mixture gas to carbogen gas has no impact on hyperpolarization-activated cyclic nucleotide-gated cation channel-mediated currents ( $I_h$ ), whereas substitution of nitrogen mixture with xenon gas mixture results in reduced  $I_h$  amplitude. (A) Hyperpolarization-activated cyclic nucleotide-gated cation channel-mediated currents ( $I_h$ ) were obtained by hyperpolarization of neurons to the indicated membrane potentials (voltage protocol not shown). Simultaneous aeration of the artificial cerebrospinal fluid with both carbogen and nitrogen mixture had no effect on  $I_h$  amplitude ( $96.9 \pm 21\%$  of carbogen saturation only; at membrane potential of  $-133$  mV). (B) Hyperpolarization-activated cyclic nucleotide-gated cation channel-mediated voltage sag and rebound burst delay were recorded in current clamp configuration. Saturation of the aCSF with carbogen and nitrogen mixture affected neither voltage sag ( $1.18 \pm 0.31$  relative to carbogen only;  $n = 5$ ;  $P > 0.05$ ) nor rebound delay ( $0.92 \pm 0.20$  relative to carbogen only;  $n = 5$ ;  $P > 0.05$ ). (C) Slices were perfused with artificial cerebrospinal fluid that was aerated with both carbogen and nitrogen mixture under control conditions, followed by the experimental condition in which nitrogen mixture was replaced by xenon mixture. Substitution of nitrogen mixture with xenon mixture significantly reduced  $I_h$  amplitude by  $23.2 \pm 18.2\%$  compared to  $I_h$  amplitude (at membrane potential of  $-133$  mV) in the presence of carbogen + nitrogen mixture ( $n = 5$ ;  $P < 0.05$ ). ns = no significant difference ( $P > 0.05$ ).

However, this argument is not entirely reasonable: It should hardly come as a surprise as, unlike the vast majority of cellular conductances that are activated upon membrane depolarization,  $I_h$  is in fact activated by hyperpolarizing voltage steps to potentials negative to the resting potential of cells.<sup>24</sup> As we reported in our original publication, the voltage required for channel activation is significantly left-shifted by xenon in both thalamocortical neurons (respectively approximately  $-99$  mV and approximately  $-108$  mV) and HEK293 cells expressing murine HCN2 channels (approximately  $-94$  and  $-99$  mV); in both instances, the xenon-induced left shift was prevented by cyclic adenosine monophosphate. These results suggest that xenon stabilizes HCN channels in the closed configuration by preventing cyclic adenosine monophosphate-mediated relief of cyclic nucleotide-binding domain-dependent inhibition of channel opening.<sup>25</sup> That the observed effect on macroscopic currents is more pronounced

at hyperpolarized membrane potentials merely reflects the fact that more channels are already open. Whether xenon inhibits cyclic adenosine monophosphate synthesis or competes for the cyclic adenosine monophosphate binding site is an open question.

### Summary of Amendments and Corrections Relevant for the *In Vitro* Data of the Original Manuscript by Mattusch *et al.*

- Aeration of the aCSF with carbogen under our experimental conditions revealed an oxygen partial pressure of approximately 516 Torr ( $[501 + 531]/2$ ) in the recording chamber.
- Our slices were perfused with a flow rate of 5 to 8 ml/min, and the storage chamber was not connected to a perfusion system as described in Mattusch *et al.*<sup>1</sup>



- All xenon concentrations (except of 100% xenon, see below) were applied within gas mixtures of 30% O<sub>2</sub>/5% CO<sub>2</sub> and, dependent on the xenon concentration, topped up to 100% with nitrogen. These xenon gas mixtures were applied together with carbogen. This information was erroneously described in the original manuscript.
- The co-application of carbogen and 100% xenon (equivalent to 2.8 mM as assessed by gas chromatography) as originally described in Mattusch *et al.*<sup>1</sup> might indeed have resulted in insufficient partial pressure of carbon dioxide to ensure a constant pH, as well as a lowered oxygen tension. Consequently, the validity of the data point reported for 2.8 mM xenon and thereby also the validity of the calculated IC<sub>50</sub> value (2.89 mM; fig. 1D in Mattusch *et al.*<sup>1</sup>) can be questioned; *i.e.*, this could have led to quantitative overestimation of the xenon effect against FSD amplitudes. Nevertheless, even without considering the data point for 2.8 mM xenon, we still show a dose-dependent effect of xenon against FSD amplitudes with a calculated IC<sub>50</sub> of 4.52 mM.
- The simultaneous aeration of the aCSF with carbogen and the xenon gas mixtures does reduce oxygen partial pressure by ~64 Torr. The additional experiments clearly demonstrate that this degree of reduction does not affect neuronal signaling or HCN channel-mediated currents.
- The effects of xenon on HCN channels are observed only at hyperpolarizing potentials because these receptors are exclusively activated at potentials negative to the resting potentials of the neurons.

In summary, xenon inhibits HCN2 channels by shifting the voltage dependence of channel activation to more negative voltages and also reduces I<sub>h</sub>. By using brain slices of HCN2<sup>-/-</sup> mice, we could show that the xenon-induced reduction of thalamocortical activity propagation was significantly attenuated, suggesting a putative role for HCN2 channels in mediating the anesthetic effects of xenon.<sup>1</sup>

### In Vivo Results

The sedative properties of xenon were tested by measuring spontaneous locomotor activity after the application of a xenon gas mixture (70% xenon/30% oxygen) for 5 min at a flow rate of 0.5 ml/min. Since the open field chamber was not fully equilibrated within 5 min, this information was incorrectly stated, and the mice were actually never exposed to 70% xenon. We now provide an analysis of the gas fraction in the open field chamber at the same level mice normally occupy while monitoring locomotor activity. After the application of the gas mixture for 5 min, mass spectrometry (MAT271; Thermo Fisher Scientific, Germany) revealed 22 ± 1, 25 ± 2, and 53 ± 2 vol percentage for xenon, oxygen and nitrogen, respectively (n = 2).

A further criticism was the short adaptation time of 5 min between placing the mice in the open field chamber and

starting monitoring locomotor activity. When placed in a new environment, explorative behavior of the animals is greatest in the first 5 min and then adapts over the course of the next 15 to 20 min. The observed reduction of locomotor activity therefore cannot be reliably attributed to an effect of xenon alone. In other words, the reduced activity could partially be due to the expected reduction in activity independent of xenon. Taken together, the study protocol did not permit an adequate test of our hypothesis. Hence, the *in vivo* data should be disregarded.

### Competing Interests

The authors declare no competing interests.

**Stephan Kratzer, M.D., Rainer Haseneder, M.D., Peter A. Goldstein, M.D., Eberhard Kochs, M.D., Gerhard Rammes, Ph.D.** Klinikum rechts der Isar, Technical University Munich, Munich, Germany (S.K.). s.kratzer@tum.de

### References

1. Mattusch C, Kratzer S, Buerge M, Kreuzer M, Engel T, Kopp C, Biel M, Hammelmann V, Ying SW, Goldstein PA, Kochs E, Haseneder R, Rammes G: Impact of hyperpolarization-activated, cyclic nucleotide-gated cation channel type 2 for the xenon-mediated anesthetic effect: Evidence from *in vitro* and *in vivo* experiments. *ANESTHESIOLOGY* 2015; 122:1047–59
2. Rungta RL, Bernier LP, Dissing-Olesen L, Groten CJ, LeDue JM, Ko R, Drissler S, MacVicar BA: Ca<sup>2+</sup> transients in astrocyte fine processes occur via Ca<sup>2+</sup> influx in the adult mouse hippocampus. *Glia* 2016; 64:2093–103
3. Willem M, Tahirovic S, Busche MA, Ovsepian SV, Chafai M, Kootar S, Hornburg D, Evans LD, Moore S, Daria A, Hampel H, Muller V, Giudici C, Nuscher B, Wenninger-Weinzierl A, Kremmer E, Heneka MT, Thal DR, Giedraitis V, Lannfelt L, Muller U, Livesey FJ, Meissner F, Herms J, Konnerth A, Marie H, Haass C: η-Secretase processing of APP inhibits neuronal activity in the hippocampus. *Nature* 2015; 526:443–7
4. Jo J, Whitcomb DJ, Olsen KM, Kerrigan TL, Lo SC, Brumercier G, Dickinson B, Scullion S, Sheng M, Collingridge G, Cho K: Aβ(1–42) inhibition of LTP is mediated by a signaling pathway involving caspase-3, Akt1 and GSK-3β. *Nat Neurosci* 2011; 14:545–7
5. Rammes G, Zeilhofer HU, Collingridge GL, Parsons CG, Swandulla D: Expression of early hippocampal CA1 LTP does not lead to changes in AMPA-EPSC kinetics or sensitivity to cyclothiazide, Pflugers Archiv Eur J Physiol 1999; 437:191–6
6. Massey PV, Johnson BE, Moulton PR, Auberson YP, Brown MW, Molnar E, Collingridge GL, Bashir ZI: Differential roles of NR2A and NR2B-containing NMDA receptors in cortical long-term potentiation and long-term depression. *J Neurosci* 2004; 24:7821–8
7. Bortolotto ZA, Collett VJ, Conquet F, Jia Z, van der Putten H, Collingridge GL: The regulation of hippocampal LTP by the molecular switch, a form of metaplasticity, requires mGlu5 receptors. *Neuropharmacology* 2005; 49(suppl 1):13–25
8. Morishita W, Lu W, Smith GB, Nicoll RA, Bear MF, Malenka RC: Activation of NR2B-containing NMDA receptors is not required for NMDA receptor-dependent long-term depression. *Neuropharmacology* 2007; 52:71–6
9. Dickinson R, Awaiz S, Whittington MA, Lieb WR, Franks NP: The effects of general anaesthetics on carbachol-evoked gamma oscillations in the rat hippocampus *in vitro*. *Neuropharmacology* 2003; 44:864–72
10. Sherwood JL, Amici M, Dargan SL, Culley GR, Fitzjohn SM, Jane DE, Collingridge GL, Lodge D, Bortolotto ZA:

- Differences in kainate receptor involvement in hippocampal mossy fibre long-term potentiation depending on slice orientation. *Neurochem Int* 2012; 61:482–9
11. Fitzjohn SM, Bortolotto ZA, Palmer MJ, Doherty AJ, Ornstein PL, Schoepp DD, Kingston AE, Lodge D, Collingridge GL: The potent mGlu receptor antagonist LY341495 identifies roles for both cloned and novel mGlu receptors in hippocampal synaptic plasticity. *Neuropharmacology* 1998; 37:1445–58
  12. Peineau S, Taghibiglou C, Bradley C, Wong TP, Liu L, Lu J, Lo E, Wu D, Saule E, Bouschet T, Matthews P, Isaac JT, Bortolotto ZA, Wang YT, Collingridge GL: LTP inhibits LTD in the hippocampus via regulation of GSK3 $\beta$ . *Neuron* 2007; 53:703–17
  13. Lauri SE, Bortolotto ZA, Nistico R, Bleakman D, Ornstein PL, Lodge D, Isaac JT, Collingridge GL: A role for Ca<sup>2+</sup> stores in kainate receptor-dependent synaptic facilitation and LTP at mossy fiber synapses in the hippocampus. *Neuron* 2003; 39:327–41
  14. Hjelmstad GO, Nicoll RA, Malenka RC: Synaptic refractory period provides a measure of probability of release in the hippocampus. *Neuron* 1997; 19:1309–18
  15. Bartlett TE, Bannister NJ, Collett VJ, Dargan SL, Massey PV, Bortolotto ZA, Fitzjohn SM, Bashir ZI, Collingridge GL, Lodge D: Differential roles of NR2A and NR2B-containing NMDA receptors in LTP and LTD in the CA1 region of two-week old rat hippocampus. *Neuropharmacology* 2007; 52:60–70
  16. Ivanov A, Zilberter Y: Critical state of energy metabolism in brain slices: The principal role of oxygen delivery and energy substrates in shaping neuronal activity. *Front Neuroenergetics* 2011; 3:9
  17. Azad SC, Monory K, Marsicano G, Cravatt BF, Lutz B, Zieglgänsberger W, Rammes G: Circuitry for associative plasticity in the amygdala involves endocannabinoid signaling. *J Neurosci* 2004; 24:9953–61
  18. Azad SC, Kurz J, Marsicano G, Lutz B, Zieglgänsberger W, Rammes G: Activation of CB1 specifically located on GABAergic interneurons inhibits LTD in the lateral amygdala. *Learn Mem* 2008; 15:143–52
  19. Rammes G, Mattusch C, Wulff M, Seeser F, Kreuzer M, Zhu K, Deussing JM, Herms J, Parsons CG: Involvement of GluN2B subunit containing *N*-methyl-D-aspartate (NMDA) receptors in mediating the acute and chronic synaptotoxic effects of oligomeric amyloid-beta (A $\beta$ ) in murine models of Alzheimer's disease (AD). *Neuropharmacology* 2017; 123:100–15
  20. Rammes G, Gravius A, Ruitenbergh M, Wegener N, Chambon C, Sroka-Saidi K, Jeggo R, Staniaszek L, Spanswick D, O'Hare E, Palmer P, Kim EM, Bywalez W, Egger V, Parsons CG: MRZ-99030: A novel modulator of A $\beta$  aggregation: II. Reversal of A $\beta$  oligomer-induced deficits in long-term potentiation (LTP) and cognitive performance in rats and mice. *Neuropharmacology* 2015; 92:170–82
  21. Sterlemann V, Rammes G, Wolf M, Liebl C, Ganea K, Müller MB, Schmidt MV: Chronic social stress during adolescence induces cognitive impairment in aged mice. *Hippocampus* 2010; 20:540–9
  22. Wang XD, Rammes G, Kraev I, Wolf M, Liebl C, Scharf SH, Rice CJ, Wurst W, Holsboer F, Deussing JM, Baram TZ, Stewart MG, Müller MB, Schmidt MV: Forebrain CRF<sub>1</sub> modulates early-life stress-programmed cognitive deficits. *J Neurosci* 2011; 31:13625–34
  23. Rammes G, Hasenjaeger A, Sroka-Saidi K, Deussing JM, Parsons CG: Therapeutic significance of NR2B-containing NMDA receptors and mGluR5 metabotropic glutamate receptors in mediating the synaptotoxic effects of  $\beta$ -amyloid oligomers on long-term potentiation (LTP) in murine hippocampal slices. *Neuropharmacology* 2011; 60:982–90
  24. Biel M, Wahl-Schott C, Michalakis S, Zong X: Hyperpolarization-activated cation channels: From genes to function. *Physiol Rev* 2009; 89:847–85
  25. Wainger BJ, DeGennaro M, Santoro B, Siegelbaum SA, Tibbs GR: Molecular mechanism of cAMP modulation of HCN pacemaker channels. *Nature* 2001; 411:805–10

(Accepted for publication July 12, 2017.)
